# Supplementary material for: Cholesterol Sequestration from Caveolae/Lipid Rafts Enhances Cationic Liposome-Mediated Nucleic Acid Delivery into Endothelial Cells
Source: MDPI journal article supplement (doi:10.3390/molecules26154626), 2021-07-30
Supplement: s1 [file s1]

## Supplementary Information

### Transfections in presence of Caveolae blockers

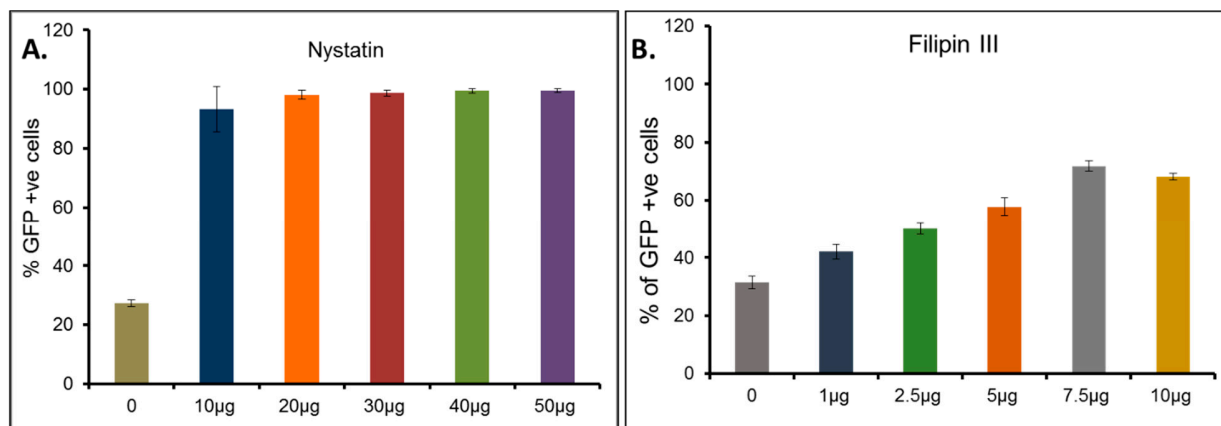

**Figure S1. Concentration dependent optimization of Caveolae Inhibitors for Endocytosis.** Transfection efficiencies of AD in Nystatin pre-treated SK-HEP-1 cells (A), Filipin III pre-treated SK-HEP-1 cells (B). % of GFP positive cells assessed by Flow cytometric analysis in Nystatin pre-treated SK-HEP-1 cells (A), Filipin III pre-treated SK-HEP-1 cells (B). Cells were pretreated with chemical inhibitors (Nystatin & Filipin-III) to block caveolae mediated endocytosis pathway. Transfections were performed as described in Materials & Methods section.

### Transfections in presence of Clathrin blockers

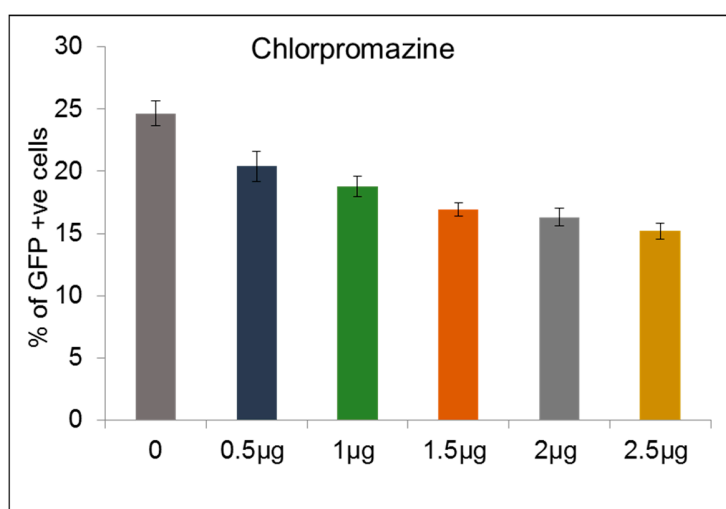

**Figure S2. Concentration dependent optimization of Clathrin Inhibitors for Endocytosis.** Transfection activity of AD in Chlorpromazine pre-treated SK-HEP-1 cells. % of GFP positive cells assessed by Flow cytometric analysis in Chlorpromazine pre-treated SK-HEP-1 cells. (A).

## Transfections in presence of Macropinocytosis blockers

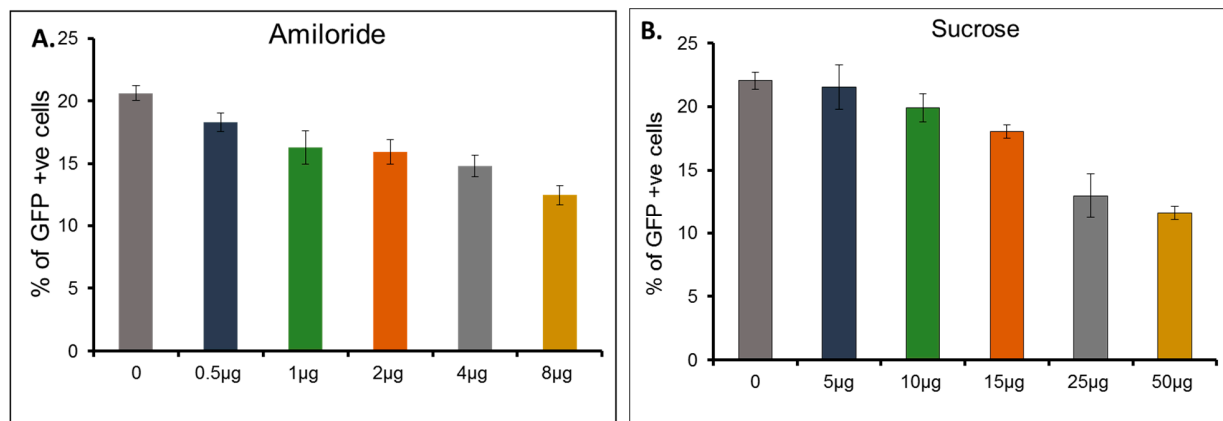

**Figure S3. Concentration dependent optimization of Macropinocytosis Inhibitors for Endocytosis** Transfection efficiencies of AD in Amiloride pre-treated SK-HEP-1 cells (A), Sucrose III pre-treated SK-HEP-1 cells (B). % of GFP positive cells assessed by Flow cytometric analysis in Amiloride pre-treated SK-HEP-1 cells (A), Sucrose pre-treated SK-HEP-1 cells (B). Cells were pretreated with chemical inhibitors (Amiloride & Sucrose) to block Macropinocytosis mediated endocytosis pathway. Transfections were performed as described in Materials & Methods section.
